# Supplementary material
Source: PubMed Central journal article supplement (PMC2680164)
Supplement: NIHMS36894-supplement-01.pdf [file NIHMS36894-supplement-01.pdf]

## Supplemental Data

### STIM2 Is a Feedback Regulator that Stabilizes Basal Cytosolic and Endoplasmic Reticulum Ca<sup>2+</sup> Levels

Onn Brandman, Jen Liou, Wei Sun Park, and Tobias Meyer

#### Table S1.

Units are fold standard deviations from median Fura-2 ratio. Gene names are based on the NCBI nomenclature.

| gene    | low Ca <sup>2+</sup> <sub>ext</sub> condition | high Ca <sup>2+</sup> <sub>ext</sub> condition |
|---------|-----------------------------------------------|------------------------------------------------|
| ATP2A1  | -0.39289                                      | -0.9418                                        |
| ATP2A2  | 11.3003                                       | 0.142401                                       |
| ATP2A3  | -0.35855                                      | 1.1669                                         |
| ATP2B1  | 1.641                                         | 33.0733                                        |
| ATP2B2  | -0.57369                                      | -2.2089                                        |
| ATP2B3  | -0.12276                                      | -0.035867                                      |
| ATP2B4  | 0.33795                                       | -1.5009                                        |
| CACNA1A | -0.58811                                      | 0.79601                                        |
| CACNA1B | 0.17067                                       | 0.36025                                        |
| CACNA1C | -0.65638                                      | 0.73057                                        |
| CACNA1D | -0.17218                                      | 0.2902                                         |
| CACNA1E | -1.8773                                       | 1.03                                           |
| CACNA1F | 0.088143                                      | 2.1226                                         |
| CACNA1G | 0.086275                                      | -0.19972                                       |
| CACNA1H | 1.3862                                        | 1.4276                                         |
| CACNA1I | -0.9814                                       | -0.79492                                       |
| CACNA1S | -2.4325                                       | -1.098                                         |
| ITPKA   | 1.7505                                        | -0.64677                                       |
| ITPKB   | 1.5912                                        | 1.0806                                         |
| ITPR1   | 1.6406                                        | -0.12037                                       |
| ITPR2   | 1.2437                                        | 0.9335                                         |
| ITPR3   | 0.51593                                       | -2.2621                                        |
| PSEN1   | -2.2494                                       | 0.18205                                        |

|        |          |           |
|--------|----------|-----------|
| PSEN2  | -0.11029 | -1.7258   |
| SLC8A1 | -2.6531  | 0.15688   |
| SLC8A2 | 0.063456 | 0.049516  |
| SLC8A3 | -2.4966  | -0.81094  |
| TRPA1  | -2.0646  | -0.63463  |
| TRPC1  | 0.31108  | 0.63618   |
| TRPC3  | -1.3776  | 2.274     |
| TRPC4  | 0.32254  | 0.58842   |
| TRPC5  | -0.21547 | -0.79262  |
| TRPC6  | -0.15239 | -0.66884  |
| TRPC7  | -1.2503  | 1.7674    |
| TRPM1  | -0.55947 | -2.1096   |
| TRPM2  | -1.6407  | 0.45256   |
| TRPM3  | -0.31696 | 1.0616    |
| TRPM4  | -1.0307  | -0.45337  |
| TRPM5  | -0.89363 | 0.5181    |
| TRPM6  | -0.42829 | 1.6638    |
| TRPM7  | -3.5     | 0.67418   |
| TRPM8  | -0.19636 | -0.49052  |
| TRPV1  | 0.43127  | -0.058567 |
| TRPV2  | -0.019   | 1.6494    |
| TRPV3  | -0.72963 | -0.76843  |
| TRPV4  | -0.36298 | 0.85333   |
| TRPV5  | 0.23015  | 2.4792    |
| TRPV6  | -0.19674 | 2.9569    |

**Table S2.**

Units are fold standard deviations from median Fura-2 ratio.

| gene      | low Ca <sup>2+</sup> <sub>ext</sub><br>condition | high Ca <sup>2+</sup> <sub>ext</sub><br>condition |
|-----------|--------------------------------------------------|---------------------------------------------------|
| ACTR3     | -2.6427                                          | 1.032                                             |
| AKAP7     | 3.0534                                           | -0.91885                                          |
| CALM1     | 2.0908                                           | 9.6558                                            |
| CLMN      | -0.47456                                         | -2.4542                                           |
| FLJ45651  | 1.1813                                           | -2.1474                                           |
| FNBP2     | -0.55684                                         | -2.683                                            |
| HAPIP     | -2.9538                                          | 0.29199                                           |
| KIAA0007  | -1.3395                                          | 2.0522                                            |
| LOC124685 | 0.031095                                         | 2.4768                                            |
| LOC389246 | 2.5197                                           | 1.12                                              |
| LOC55971  | 3.2384                                           | 0.34667                                           |
| PIP5K1A   | -2.0378                                          | 1.1826                                            |
| PPEF1     | 0.87681                                          | -2.7225                                           |
| PPP1R12A  | 2.3008                                           | 0.33042                                           |
| PRKAR1A   | 1.9521                                           | -3.0284                                           |
| RAC1      | -3.4616                                          | -2.6044                                           |
| SEC23IP   | 1.3801                                           | -2.3268                                           |
| SSH1      | -0.18364                                         | -2.0778                                           |
| STIM2     | -6.5051                                          | -1.8468                                           |

**Figure S1**

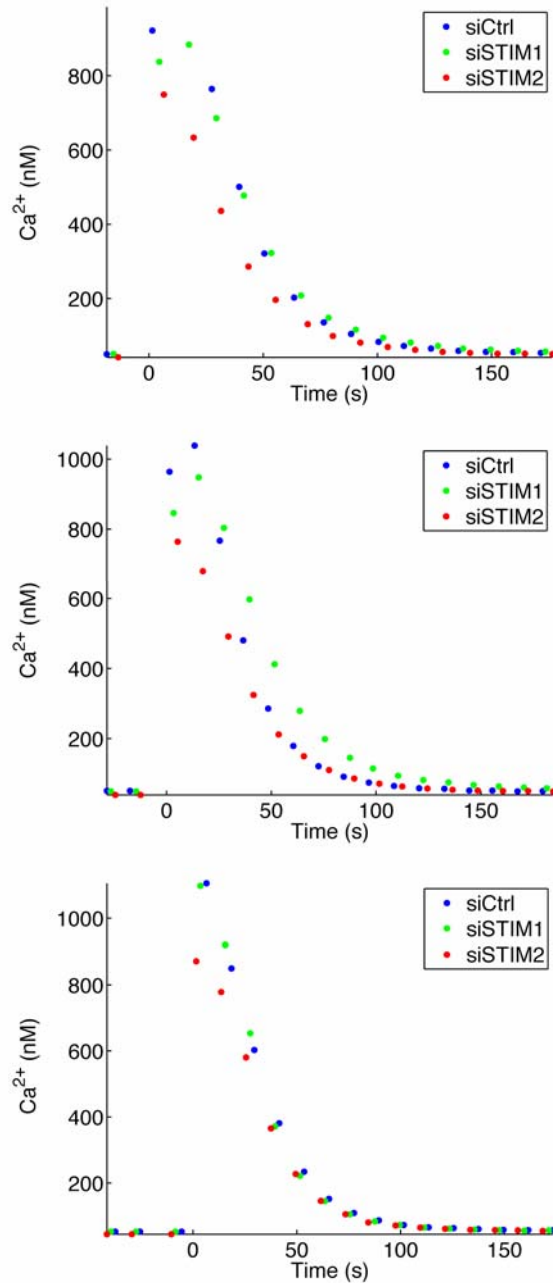

Single-well traces to indirectly assay ER  $\text{Ca}^{2+}$  concentration in Figure 2C. Addition of ionomycin and EGTA was used to rapidly release ER  $\text{Ca}^{2+}$  and the resulting cytosolic  $\text{Ca}^{2+}$  signal was measured using Fura-2. Cells were transfected with siRNA for STIM1, STIM2 or GL3 (control).

**Figure S2**

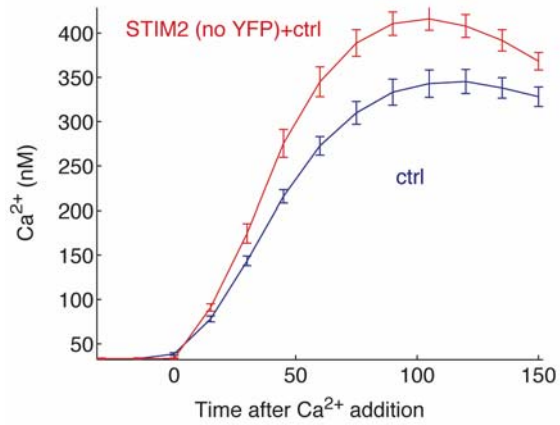

A wildtype STIM2 construct (without YFP tag) also increases R-SOC Ca<sup>2+</sup> influx. Cells were transfected with YFP or co-transfected with YFP and YFP-free STIM2 for 5 hours. Cells were selected expressing 7.5 to 15 times background. N=6 sites from 3 wells. Error bars represent standard error.

**Figure S3**

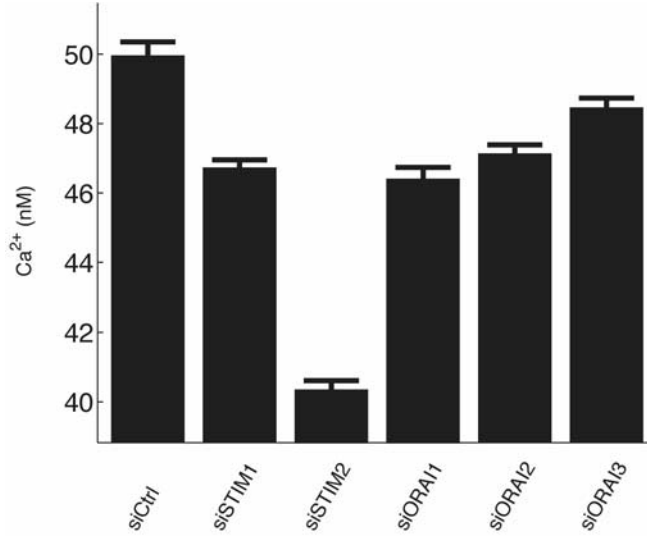

Basal cytosolic Ca<sup>2+</sup> measurements after 3 day transfection with siSTIM1-2 and, for comparison, siOrai1-3 and GL3 (control). N=10 sites. Error bars represent standard error.

**Figure S4**

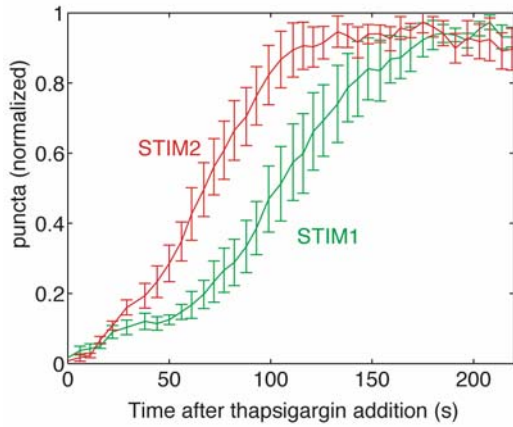

Time-course of STIM1 and STIM2 puncta formation upon thapsigargin addition. 1  $\mu$ M thapsigargin was added to HeLa cells and imaged for 220 seconds. Images were then analyzed for puncta content as in described in Materials and Methods section. N=4 cells each. Error bars represent standard error.

**Figure S5**

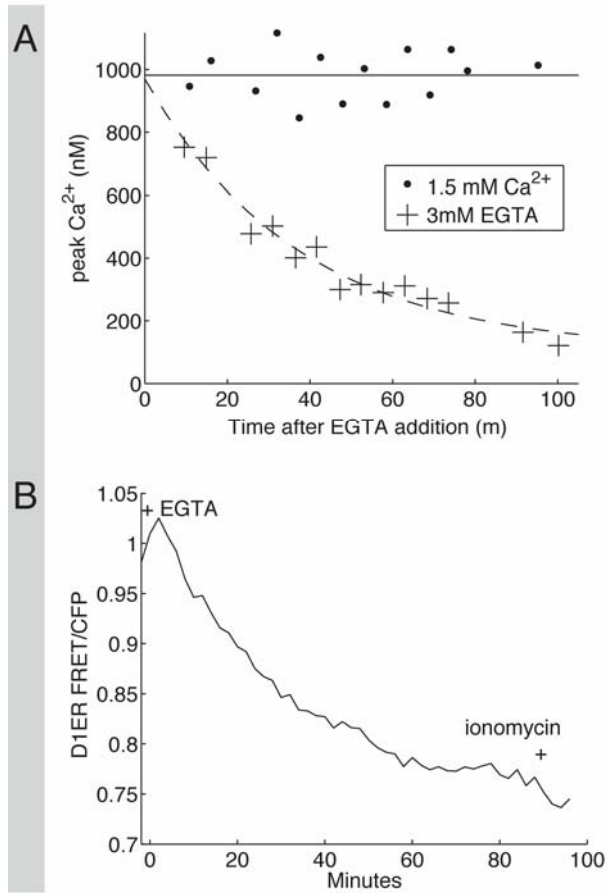

Calibration of the ER Ca<sup>2+</sup> content at different time-points following external addition of EGTA. (A) 3 mM EGTA was added to wells at time = 0 min. Ionomycin was added to different wells at the indicated time points. The measured  $\Delta\text{Ca}^{2+}$  peak heights were fit to an exponential decay. (B) FRET measured using the D1ER cameleon probe. Average relative FRET signal for 6 cells imaged using a 40x confocal microscope. 1  $\mu\text{M}$  ionomycin was added near the end of the timecourse.



**Figure S6**

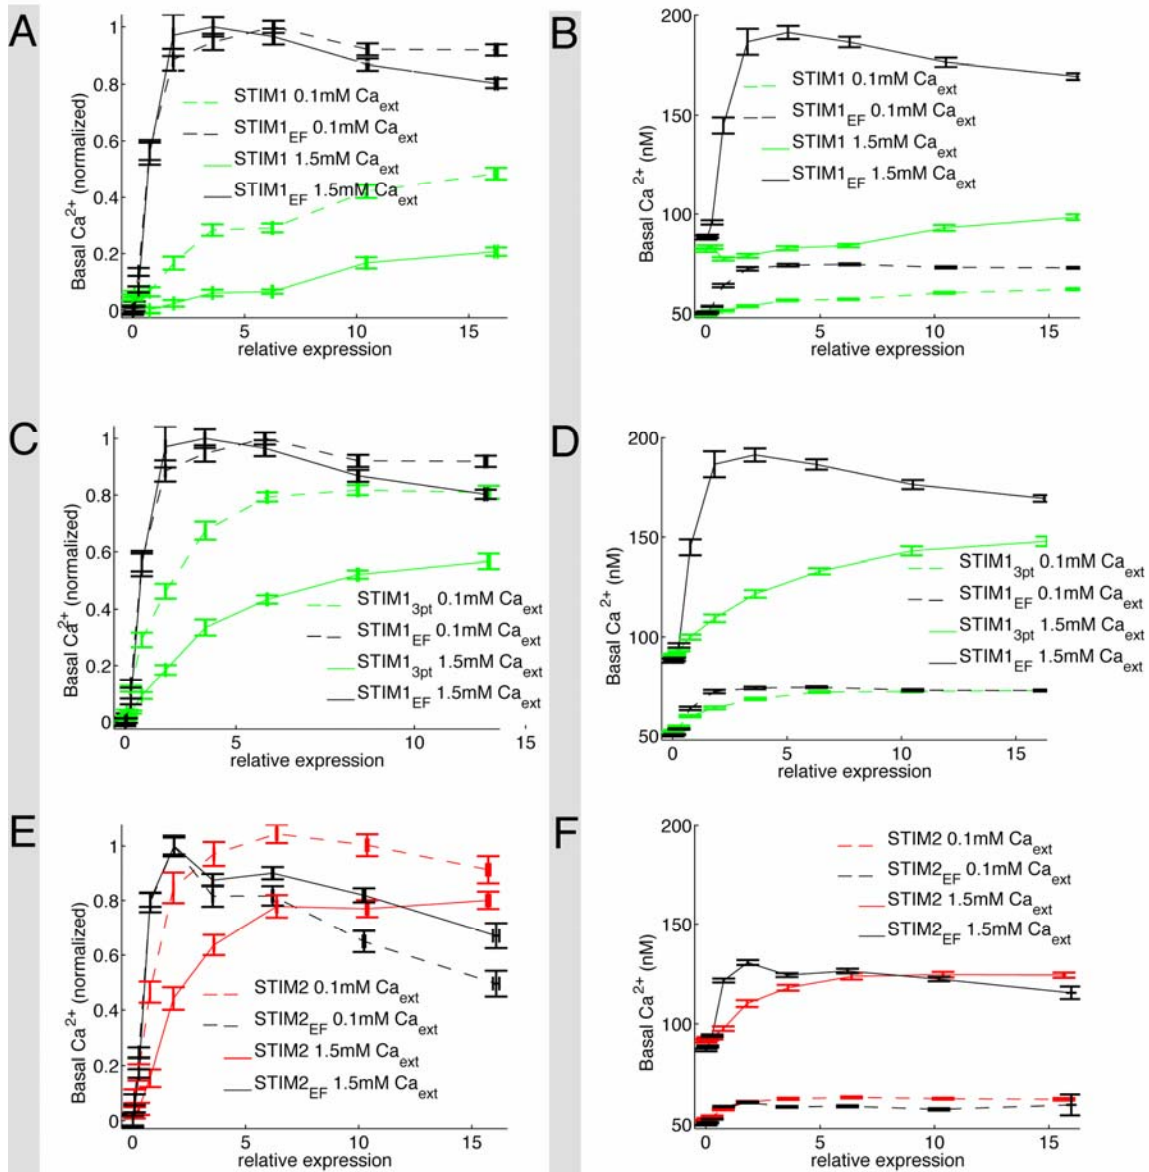

$\text{Ca}^{2+}$  levels in cells expressing different concentrations of STIM1 and STIM2 constructs. Basal  $\text{Ca}^{2+}$  was measured for the reduced and normal ER conditions as described in the main text (reduced conditions are the low  $\text{Ca}^{2+}$  conditions from the siRNA screen). Both raw traces and traces normalized to constitutively active mutants are shown. EF hand switch mutant (STIM1<sub>EF</sub>→STIM2) is labeled with the subscript “3pt”. Error bars represent standard error.

**Figure S7**

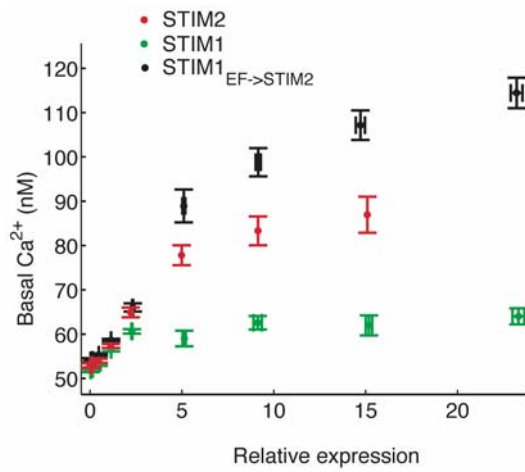

Basal Ca<sup>2+</sup> levels in cells expressing a STIM1 construct with its EF hand mutated to be similar to STIM2 (STIM1<sub>EF->STIM2</sub>). Basal Ca<sup>2+</sup> concentration is shown as a function of the expression level of YFP-STIM1<sub>EF->STIM2</sub> and compared to that of YFP-STIM1, YFP-STIM2 and YFP control. Error bars represent standard error.

## Figure S8

STIM2 Primary accession number: Q9P246

| Construct name              | Description                | Differences from Swiss-Prot          |
|-----------------------------|----------------------------|--------------------------------------|
| STIM2                       | CMV_SP_YFP_STIM2(15-746AA) | P38L, V222I, E575V                   |
| STIM2 (no tag)              | CMV_SP_STIM2(15-746AA)     | P38L, V222I, E575V                   |
| STIM2 <sub>EF</sub>         | CMV_SP_YFP_STIM2(15-746AA) | P38L, V222I, E575V, D80A             |
| STIM2 <sub>EF</sub> ->STIM1 | CMV_SP_YFP_STIM2(15-746AA) | P38L, V222I, E575V, K83A, D84N, G86D |
| STIM1                       | CMV_SP_YFP_STIM1(23-685AA) |                                      |
| STIM1 <sub>EF</sub>         | CMV_SP_YFP_STIM1(23-685AA) | D76A                                 |
| STIM1 <sub>EF</sub> ->STIM2 | CMV_SP_YFP_STIM1(23-685AA) | A79K, N80D, D82G                     |

### Cloned STIM2 DNA sequence (15-746AA):

TGCGAGCTTGTGCCCGGCACCTCCGCGGGCGGGCGGCGACTGGCTCTGCCGCAACTGCCGCTCCTCTCTCGCCGCGGC  
 GGCCGGCGATAGCCCGCGCTCATGACAGATCCCTGCATGTCAGTCCACCATGCTTTACAGAAGAAGACAGATTTA  
 GTCTGGAAGCTCTTCAAACAATACATAAACAAATGGATGACAAAGATGGTGAATTGAAGTAGAGGAAAGTGATGAA  
 TTCATCAGAGAAGATATGAAATATAAAGATGCTACTAATAAACACAGCCATCTGCACAGAGAAGATAAACATATAACGAT  
 TGAGGATTTATGGAACGATGGAACATCAGAAGTTCATAATTGGACCCCTGAAGACACTCTTCAGTGGTTGATAGAGT  
 TTGTTGAACTACCCCAATATGAGAAGAATTTAGAGACAACAATGTCAAAGGAACGACACTTCCAGGATAGCAGTGCAC  
 GAACCTTCATTTATGATCTCCAGTTGAAATCAGTGACCGGAGTCACAGACAAAACTTCAGCTCAAGGCATTGGATGT  
 GGTTTTGGTGGACTCTAACACGCCACCTCATAACTGGATGAAAGATTTTATCCTCACAATTTCTATAGTAATTGGTG  
 TTGGAGGCTGCTGGTTGCTTATACGCAGAATAAGACATCAAAGAACATGTTGCAAAAATGATGAAAGATTAGAGAGC  
 TTACAAACTGCAGAGCAAAGTCTAATGGACTTACAAGAGAGGCTTGAAGGCACAGGAAGAAAACAGAAATGTTGCTGT  
 AGAAAAGCAAATTTAGAGCGCAAATGATGGATGAAATCAATTATGCAAAGGAGGAGGCTTGTGCGCTGAGAGAGCTAA  
 GGGAGGGAGCTGAATGTGAATTGAGTAGACGTCAATGACAGAACAGGAATTGGAACAGGTTGCGATGGCTCTGAAAAAG  
 GCCGAAAAGAAATTTGAACTGAGAAGCAGTTGGTCTGTTCCAGATGCACTTCAGAAATGGCTTCAGTTAACACATGAAGT  
 AGAAGTCAATACTACAATATAAAGACAAAACGCTGAAATGCAGCTAGCTATTGCTAAAGATGAGGCAGAAAAAATTA  
 AAAAGAAGAGAAGCAGACTTTGGGACTCTGCAGTTGCACACAGCTCCTCCCTAGATGAGGTAGACCACAAAATCTGT  
 GAAGCAAAGAAAGCTCTCTCTGAGTTGACAACTGTTTACGAGAAGCAGCTTTTTCGCTGGCAACAAATGAGAAGATCTG  
 TGCTTTTCAGATAGCCATAACTCAGGACTCCCGAGCCTGACCTCTTCCCTTTATTCTGATCACAGCTGGGTGGTGATGC  
 CCAGAGTCTCCATCCACCTATCCAATTGCTGGAGGAGTTGATGACTTAGATGAAGACACACCCCAATAGTGCACAA  
 TTTCCCGGGACCATGGCTAAACCTCCTGGATCATTAGCCAGAAGCAGCAGCCTGTGCCGTTACGCGCCGAGCATTGTGCC  
 GTCCTCGCCTCAGCCTCAGCGAGCTCAGCTTGTCCACACGCCCCACCCGTCACACCCCTGGCACCCCTCACACCCCGC  
 AACACACACCACACTCCTTGCCCTCCCTGATCCAGATATCCTCTCAGTGTCAAGTTGCCCTGCGCTTTATCGAAATGAA  
 GTGGAGGAAGAGGCCATTTACTCTCTGCTGAAAAGCAATGGGAAGTCCAGACACAGCTTCAGAATGTGACTCCTTAA  
 TTCTTCCATTGGAAGGAACAGTCTCCTCCTTAAGCCTCGAGATATACCAAACATTATCTCCGCGAAAGATATCAAGAG  
 ATGAGGTGTCCTAGAGGATTCCTCCGAGGGGATTCGCTGTAAGTGTGATGTCTTGGGGTTCTCCGACTGTGTA  
 GGTCTGACAGAGACTAAGAGTATGATCTTCAGTCTGCAAGCAAAGTGTACAATGGCATTTTGGAGAAATCCTGTAGCAT  
 GAACCACTTTCCAGTGGCATCCCGGTGCCTAAACCTCGCCACACATCATGTTCTCAGCTGGCAACGACAGTAAACCAG  
 TTCAGGAAGCCCAAGTGTGCCAGAATAAGCAGCATCCACATGACCTTTGTCATAATGGAGAGAAAAGCAAAAAGCCA  
 TCAAAAATCAAAGCCTTTTAAAGAAGAAATCTAAGTGA

### STIM1 DNA sequence (23-685AA):

CTCAGCCATAGTCACAGTGAGAAGCGCAGGAACAGCTCGGGGGCAACTCTGAGGAGTCCACTGCAGCAGAGTTTTG  
 CCGAATTTGACAAGCCCTGTGTACAGTGAGGATGAGAACTCAGCTTCGAGGCAGTCCGTAACATCCACAACTGATGG  
 ACGATGATGCCAATGGTGTGGATGTGGAAGAAAGTGTAGTTCCTGAGGGAAGACCTCAATTACCATGACCCAACA  
 GTGAAACACAGCACCTTCCATGGTGAGGATAAGCTCATCAGCCTGGAGGACCTGTGGAAGGCATGGAAGTCATCAGAAGT  
 ATACAATTGGACCGTGGATGAGGTGGTACAGTGGCTGATCACATATGTGGAGCTGCCTCAGTATGAGGAGACCTCCGGA  
 AGCTGCAGCTCAGTGCCATGCCATGCCAAGGTGGCTGTACCAACACCACCATGACAGGGACTGTGCTGAAGATGACA  
 GACCGGAGTCATCGGCAGAAGTGCAGCTGAAGGCTCTGGATACAGTGCTTTGGGCTCCTCTCTGACTCGCCATAA

TCACCTCAAGGACTTCATGCTGGTGGTGTCTATCGTTATTGGTGTGGGCGGCTGCTGTTTGCCTATATCCAGAACCCTT  
ACTCCAAGGAGCACATGAAGAAGATGATGAAGGACTTGGAGGGTTACACCGAGCTGAGCAGAGTCTGCATGACCTTCAG  
GAAAGGCTGCACAAGGCCAGGAGGAGCACCGCACAGTGGAGGTGGAGAAGGTCCATCTGGAAAAGAAGCTGCGCGATGA  
GATCAACCTTCTAAGCAGGAAGCCAGCGGCTGAAGGAGCTGCGGGAGGGTACTGAGAATGAGCGGAGCCGCAAAAAT  
ATGCTGAGGAGGAGTTGGAGCAGGTTCCGGGAGGCTTGGAGAAAGCAGAGAAGGAGCTAGAATCTCACAGCTCATGGTAT  
GCTCCAGAGGCCCTTCAGAAGTGGCTGCAGCTGACACATGAGGTGGAGGTGCAATATTACAACATCAAGAAGCAAAAATGC  
TGAGAAGCAGCTGCTGGTGGCCAAGGAGGGGCTGAGAAGATAAAAAAGAAGAGAACACACTCTTTGGCACCTTCCACG  
TGGCCACAGCTCTCCCTGGATGATGTAGATCATAAAATCTAACAGCTAAGCAAGCACTGAGCGAGGTGACAGCAGCA  
TTGCGGGAGCGCTGCACCGCTGGCAACAGATCGAGATCCTCTGTGGCTCCAGATTGTCAACAACCCTGGCATCCACTC  
ACTGGTGGCTGCCCTCAACATAGACCCAGCTGGATGGGCAGTACACGCCCAACCCTGCTCACTTCATCATGACTGACG  
ACGTGGATGACATGGATGAGGAGATTGTGTCTCCCTTGCCATGCAGTCCCTAGCCTGCAGAGCAGTGTTCGGCAGCGC  
CTGACGGAGCCACAGCATGGCTGGGATCTCAGAGGGATTTGACCCATTCCGATTCCGAGTCTCCCTCCACATGAGTGA  
CCGCCAGCGTGTGGCCCCAAACCTCCTCAGATGAGCCGTGCTGCAGACGAGGCTCTCAATGCCATGACTTCCAATGGCA  
GCCACCGCTGATCGAGGGGTCCACCCAGGCTCTGTGGTGGAAACTGCCTGACAGCCCTGCCCTGGCCAAGAAGGCA  
TACTGGCGCTGAACCATGGGCTGGACAAGGCCACAGCCTGATGGAGCTGAGCCCTCAGCCACCTGGTGGCTCTCC  
ACATTTGGATTCTCCCGTTCTCAGACCCAGCTCCCGAGCCAGACACACCATCTCCAGTTGGGGACAGCCGAGCCC  
TGCAAGCCAGCCGAAACACAGCATTCCCGACCTGGCTGGCAAGAAGGCTGTGGCTGAGGAGGATAATGGCTCTATTGGC  
GAGGAACAGACTCCAGCCAGCCGGAAGAAGTTTCTCTCAAATCTTTAAGAAGCCTCTTAAGAAGTAG

**Signal Peptide DNA sequence from STIM1(1-22AA):**

ATGGATGATGCGTCCGCTTGGCCCTGTGGCTCCTCTGGGGACTCCTCTGCACCAGGGCCAGAGC

**Cloned STIM2 Protein sequence (15-746AA):**

CELVPRHLRGRRTGSAATAASSLAAAAGDSPALMTDPCMSLSPPCFTEEDRFSLEALQT  
IHKQMDDDKDGGIEVEESDEFIREDMKYKDATNKHSHLHREDKHITIEDLWKRWKTSEVH  
NWTLEDTLQWLIEFVELPQYKFNFRDNNVKGTTLPRIAVHEPSPFMISQLKISDRSHRQKL  
QLKALDVVLFGLTRPPHNWMMKDFILTSIVIGVGGCWFAYTQNKTSKEHVAKMMKDLES  
LQTAEQSLMDLQERLEKAQEENRNVAVEKQNLERKMMDEINYAKEEACRLRELREGAECE  
LSRRQYAEQELEQVRMALKAEKFEFLRSSWSPDALQKWLQLTHEVEVQYNYNIKRQNAE  
MQLIAIAKDEAEKIKKRSTVFGTLVHAHSSSLDEVHDKILEAKKALSELTTCLRERLFRW  
QQLKICGFQIAHNSGLPSTSSLYSDHSWVVMPRVSIPIPIAGGVDDLDETPPIVQ  
FPGTMAKPPGSLARSSSLCRSRRSIVPSSPQPRALPHAPHPHPRHPHPHQHTPHSL  
PSPDPDILSVSSCPALYRNEVEEEAIYFSAEKQWEVPDTASECDSLNSIGRKQSPPLSL  
EIQTLSPRKISRDEVSLEDSRGDSPVTVDVSWGSPDCVGLTETKSMIFSPASKVYNGI  
LEKSCSMNQLSSGIPVKPRHTSCSSAGNDSKPVQEAPSVARISSIPHDLCHNGEKSKKP  
SKIKSLFKKSKstop

**STIM1 Protein sequence (23-685AA):**

LSHSHSEKATGTSSGANSEESTAAEFCEFRIDKPLCHSEDEKLSFEAVRNIHKLMDDDANGD  
VDVEESDEFRLREDLNYHDPTVKHSTFHGEDKLISVEDLWKAWKSSEVYNWTVDEVVQWLI  
TYVELPQYEETFRKLQLSGHAMPRLAVTNTMTGTVLKMTDRSHRQKLQKALDVTFLGP  
PLLTRHNHLKDFMLVVSIVIGVGGCWFAYIQNRYSKHEMCKMMKDLEGLHRAEQSLHDLQ  
ERLHKAQEEHRTVEVEKVLKLRDEINLAKQEAQRLKELREGTENERSRQKYAEEELE  
QVREALRKAKEKELESWSWYAPEALQKWLQLTHEVEVQYNYNIKKQNAEKQLLVAKEGAEK  
IKKRNTLFGTFHVHAHSSSLDDVDHKILTAKQALSEVTAALRERLHRWQQIEILCGFQIV  
NNPGIHSVAALNIDPSWVGSTRPNPAHFIMTDDVDDMDEEIVSPLSMQSPSLQSSVRQR  
LTEPQHGLGSQRDLTHSDESSLHMSDRQRVAPKPPQMSRAADEALNAMTSNGSHRLIEG  
VHPGSLVEKLPDPSALAKKALLALNHGLDKAHSMLSPSPAPPGGSPHLDSSRSHPSPSP  
DPDTPSPVGDSTRALQASRNTRIPHLAGKKAVAEEDNGSIGEETDSSPGRKFFPLKIFKFP  
LKKstop

**Signal Peptide from STIM1(1-22AA):**

MDVCVRLALWLLWGLLLHGGQS

## Figure S9

### 7Dharmacon SMART STIM2 siRNA pool

1)

sense sequence

AGACACAGCUUCAGAAUGUUU

antisense sequence

5'-PACAUUCUGAAGCUGUGUCUUU

2)

sense sequence

GCUUUCAGAUAGCCCAUAAUU

antisense sequence

5'-PUUAUGGGCUAUCUGAAAGCUU

3)

sense sequence

CUUUAAAGCCUCGAGAUAAUU

antisense sequence

5'-PUAAUUCUCGAGGCUAAAGUU

4)

sense sequence

AGAAGCAGUUGGUCUGUUCUU

antisense sequence

5'-PGAACAGACCAACUGCUUCUUU

### Ambion STIM1 siRNA pool

1)

sense sequence

GGAUGCUGUCAUUUUUUGAtt

antisense sequence

UCAAAAAAUGACAGCAUCctt

2)

sense sequence

GGAUGAGAAACUCAGCUUCtt

antisense sequence

GAAGCUGAGUUUCUCAUCctc

3)

sense sequence

GGGAAGACCUCAAUUACCAtt

antisense sequence

UGGUAAUUGAGGUCUUCctc

**Dharmacon SMART ORAI1 siRNA pool**

1)

sense sequence

GCUCACUGGUUAGCCAUAAUU

antisense sequence

5'-PUUAUGGCUAACCAGUGAGCUU

2)

sense sequence

GGCCUGAUCUUUAUCGUCUUU

antisense sequence

5'-PAGACGAUAAAGAUCAGGCCUU

3)

sense sequence

UGAGCAACGUGCACAUCUUU

antisense sequence

5'-PAGAUUGUGCACGUUGCUCAUU

4)

sense sequence

GCACCGUUUGCGCUC AUGUU

antisense sequence

5'-PCAUGAGCGCAAACAGGUGCUU

**Dharmacon SMART ORAI2 siRNA pool**

1)

sense sequence

GAGCUU AACGUGCCUAUCGUU

antisense sequence

5'-PCGAUAGGCACGUUAAGCUCUU

2)

sense sequence

UGGAACUGGUCACCUCUAAUU

antisense sequence

5'-PUUAGAGGUGACCAGUUC CAUU

3)

sense sequence

GGGCAUGGAUUACCGGACUU

antisense sequence

5'-PGUCCCGUAAUCCAUGCCCUU

4)

sense sequence

CACCGUCUUGGCAUCCUAAUU

antisense sequence

5'-PUAGGAUGCCAAGCACGGUGUU

**Dharmacon SMART ORAI3 siRNA pool**

1)

sense sequence

GGAACUAGAGGAACUGAAUUU  
antisense sequence  
5'-PAUUCAGUCCUCUAGUCCUU

2)  
sense sequence  
GCACCUCUUUGCACUCAUGUU  
antisense sequence  
5'-PCAUAGAGUGCAAAGAGGUGCUU

3)  
sense sequence  
CAAGACAGACCGCUACAAGUU  
antisense sequence  
5'-PCUUGUAGCGGUCUGUCUUGUU

4)  
sense sequence  
GGGUCAAGUUUGGCCAUUU  
antisense sequence  
5'-PAUGGGCACAACUUGACCCUU
